# Supplementary material for: Cyclin-dependent kinase 2 is an ideal target for ovary tumors with elevated cyclin E1 expression
Source: PubMed Central journal article supplement (PMC4673230; doi:10.18632/oncotarget.4600), 2015-06-23
Supplement: oncotarget-06-20801-s001.pdf [file oncotarget-06-20801-s001.pdf]

# Cyclin-dependent kinase 2 is an ideal target for ovary tumors with elevated cyclin E1 expression

## Supplementary Material

### SUPPLEMENTAL INFORMATION

Primers for CCNE1

Forward: AGCGGTAAGAAGCAGAGCAG

Reverse: CGCTGCAACAGACAGAAGAG

Primers for  $\beta$ -actin

Forward: 5'-GTGCTCAGGGCTTCTTGTCCTTT-3'

Reverse: 5'-TTTCTCCATGTCGTCCCAGTTGGT-3'

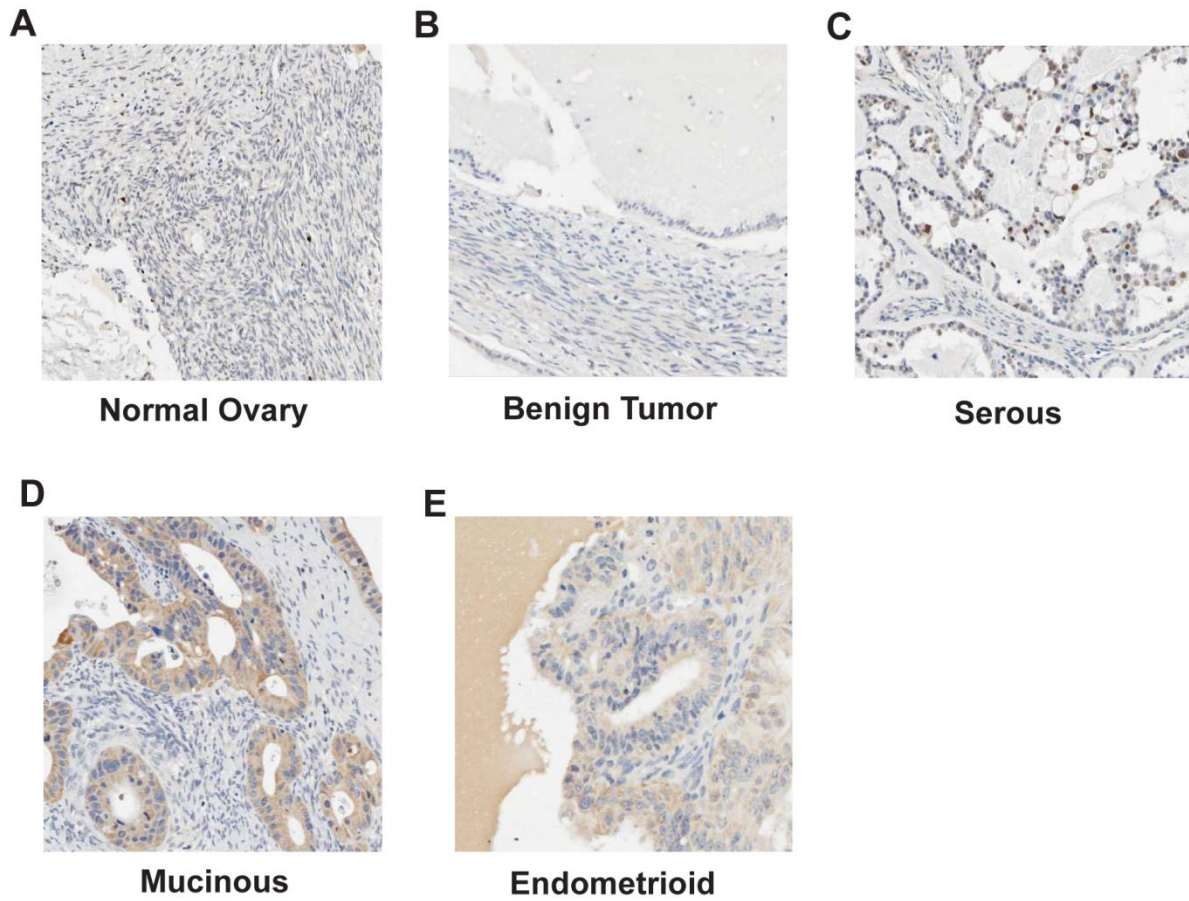

**Figure S1. Immunohistochemistry of CCNE1 on ovary tumor specimens. A.** Normal ovary tissue. **B.** Benign ovary tumor tissue. **C.** Serous type of ovary tumor specimen. **D.** Mucinous type of ovary tumor specimen. **E.** Endometrioid type of ovary tumor specimen.

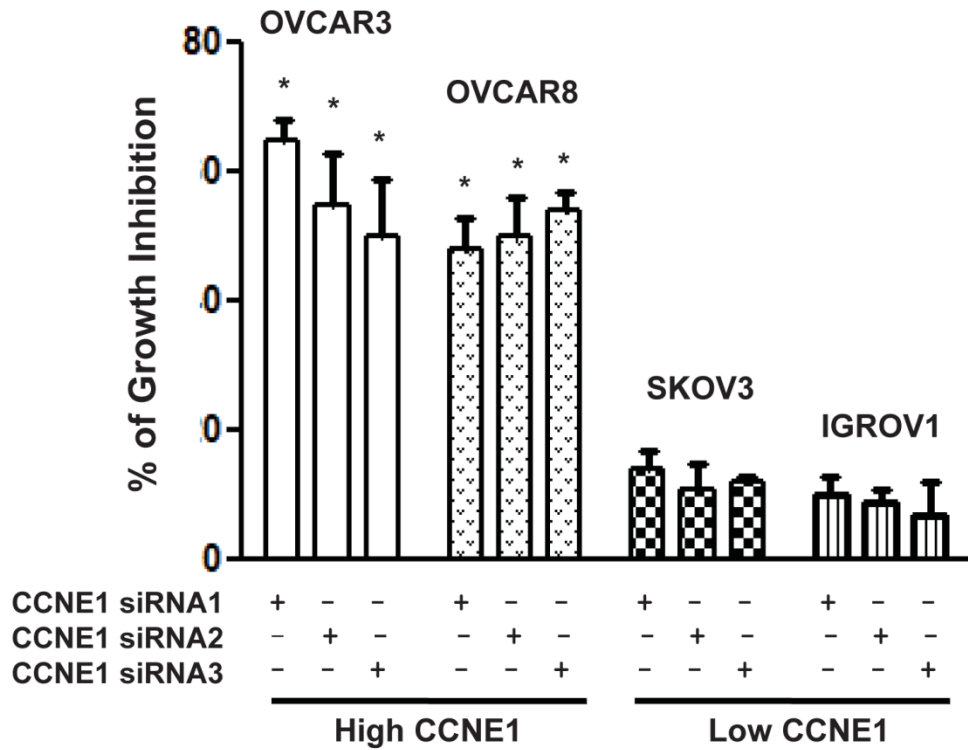

**Figure S2. Ovarian cancer cells with elevated CCNE1 expression is sensitive to CCNE1 knockdown.** Cells were transfected with scrambled control or CCNE1 siRNAs for overnight, then re-fed with fresh medium and cultured for 4 days prior to MTT assay to assess cell growth. % of growth inhibition =  $[(OD_{\text{control}} - OD_{\text{siRNA}}) / OD_{\text{control}}] \times 100$ . Data are means  $\pm$  SE. n=4. \*,  $P < 0.005$  vs scrambled control.

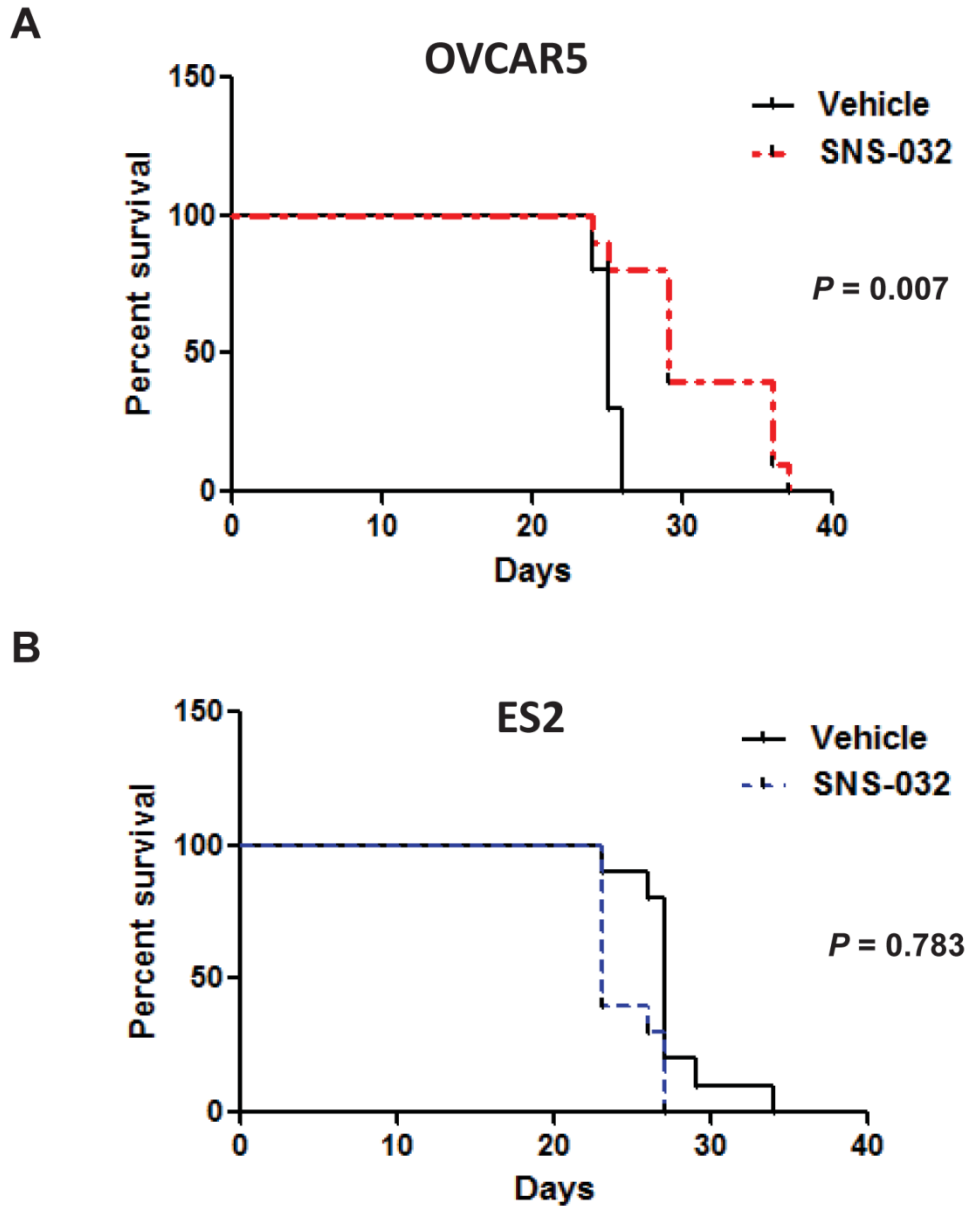

**Figure S3. SNS-032 prolongs the survival of mice bearing tumors derived from ovarian cancer cells with elevated CCNE1 expression.** Kaplan-Meier curve summarizing survival of mice injected with OVCAR5 (**A**) and ES2 cells (**B**). Female athymic nude mice were injected *i.p.* with OVCAR5 or ES2 cells ( $1 \times 10^7$  cells/mouse) for 5 days followed by administration of 30 mg/kg SNS-032 twice per week until animal died.
